# Supplementary material for: Association between Single Nucleotide Polymorphisms Related to Vitamin D Metabolism and the Risk of Developing Asthma
Source: MDPI journal article supplement (doi:10.3390/nu15040823), 2023-02-05
Supplement: s1 [file s1]

Table S1. Hardy-Weinberg Equilibrium.

| Chr | SNP        | Sample | Minor Allele | Major Allele | Genotype counts | Observed heterozygosity | Expected heterozygosity | p-value |
|-----|------------|--------|--------------|--------------|-----------------|-------------------------|-------------------------|---------|
| 4   | rs7041     | ALL    | T            | G            | 140/335/178     | 0.513                   | 0.4983                  | 0.4801  |
| 4   | rs7041     | AFF    | T            | G            | 43/109/67       | 0.4977                  | 0.494                   | 1.00    |
| 4   | rs7041     | UNAFF  | T            | G            | 97/226/111      | 0.5207                  | 0.4995                  | 0.4418  |
| 11  | rs10741657 | ALL    | A            | G            | 96/284/271      | 0.4363                  | 0.4639                  | 0.1288  |
| 11  | rs10741657 | AFF    | A            | G            | 36/91/93        | 0.4136                  | 0.4664                  | 0.111   |
| 11  | rs10741657 | UNAFF  | A            | G            | 60/193/178      | 0.4478                  | 0.4625                  | 0.5321  |
| 12  | rs731236   | ALL    | C            | T            | 108/311/233     | 0.477                   | 0.4816                  | 0.8075  |
| 12  | rs731236   | AFF    | C            | T            | 41/100/79       | 0.4545                  | 0.4851                  | 0.4038  |
| 12  | rs731236   | UNAFF  | C            | T            | 67/211/154      | 0.4884                  | 0.4797                  | 0.7637  |
| 12  | rs7975232  | ALL    | C            | A            | 145/341/169     | 0.5206                  | 0.4993                  | 0.309   |
| 12  | rs7975232  | AFF    | C            | A            | 55/108/58       | 0.4887                  | 0.4999                  | 0.7878  |
| 12  | rs7975232  | UNAFF  | C            | A            | 90/233/111      | 0.5369                  | 0.4988                  | 0.1243  |
| 12  | rs1544410  | ALL    | A            | G            | 132/311/211     | 0.4755                  | 0.4927                  | 0.3829  |
| 12  | rs1544410  | AFF    | A            | G            | 43/101/77       | 0.457                   | 0.4882                  | 0.3375  |
| 12  | rs1544410  | UNAFF  | A            | G            | 89/210/134      | 0.485                   | 0.4946                  | 0.6979  |
| 12  | rs2228570  | ALL    | T            | C            | 84/301/269      | 0.4602                  | 0.46                    | 1.00    |
| 12  | rs2228570  | AFF    | T            | C            | 30/91/100       | 0.4118                  | 0.4498                  | 0.2311  |
| 12  | rs2228570  | UNAFF  | T            | C            | 54/210/169      | 0.485                   | 0.4647                  | 0.4084  |
| 12  | rs11568820 | ALL    | A            | G            | 46/253/345      | 0.3929                  | 0.3922                  | 1.00    |
| 12  | rs11568820 | AFF    | A            | G            | 26/81/113       | 0.3682                  | 0.4218                  | 0.07743 |
| 12  | rs11568820 | UNAFF  | A            | G            | 20/172/232      | 0.4057                  | 0.375                   | 0.1193  |
| 12  | rs4646536  | ALL    | G            | A            | 36/264/352      | 0.4049                  | 0.3826                  | 0.1522  |
| 12  | rs4646536  | AFF    | G            | A            | 12/92/117       | 0.4163                  | 0.3871                  | 0.3015  |
| 12  | rs4646536  | UNAFF  | G            | A            | 24/172/235      | 0.3991                  | 0.3802                  | 0.3746  |
| 12  | rs3782130  | ALL    | C            | G            | 34/264/354      | 0.4049                  | 0.3796                  | 0.09895 |
| 12  | rs3782130  | AFF    | C            | G            | 12/92/115       | 0.4201                  | 0.3894                  | 0.2991  |
| 12  | rs3782130  | UNAFF  | C            | G            | 22/172/239      | 0.3972                  | 0.3744                  | 0.2479  |
| 12  | rs10877012 | ALL    | T            | G            | 36/259/358      | 0.3966                  | 0.3784                  | 0.2552  |
| 12  | rs10877012 | AFF    | T            | G            | 14/93/114       | 0.4208                  | 0.3976                  | 0.4981  |
| 12  | rs10877012 | UNAFF  | T            | G            | 22/166/244      | 0.3843                  | 0.368                   | 0.4325  |
| 12  | rs703842   | ALL    | C            | T            | 35/264/350      | 0.4068                  | 0.3822                  | 0.123   |
| 12  | rs703842   | AFF    | C            | T            | 13/95/112       | 0.4318                  | 0.3988                  | 0.309   |
| 12  | rs703842   | UNAFF  | C            | T            | 22/169/238      | 0.3939                  | 0.3732                  | 0.3008  |
| 20  | rs4809957  | ALL    | G            | A            | 21/246/375      | 0.3832                  | 0.348                   | 0.01218 |
| 20  | rs4809957  | AFF    | G            | A            | 8/84/127        | 0.3836                  | 0.3524                  | 0.2499  |
| 20  | rs4809957  | UNAFF  | G            | A            | 13/162/248      | 0.383                   | 0.3457                  | 0.0339  |
| 20  | rs6068816  | ALL    | T            | C            | 11/135/506      | 0.2071                  | 0.2118                  | 0.5775  |
| 20  | rs6068816  | AFF    | T            | C            | 4/43/174        | 0.1946                  | 0.2041                  | 0.5035  |
| 20  | rs6068816  | UNAFF  | T            | C            | 7/92/332        | 0.2135                  | 0.2157                  | 0.8226  |

Chr: Chromosome; ALL: All population; AFF: Case group; UNAFF: Control group

Shade means the value is significant for t test (p&lt;0.05).

Table S2. Linkage disequilibrium

| Chr | BP | SNP | Chr | BP | SNP | R2 | D' |
|-----|----|-----|-----|----|-----|----|----|
|-----|----|-----|-----|----|-----|----|----|

|                                                    |          |            |    |          |            |          |          |
|----------------------------------------------------|----------|------------|----|----------|------------|----------|----------|
| 12                                                 | 47844974 | rs731236   | 12 | 47845054 | rs7975232  | 0.578315 | -        |
| 12                                                 | 47844974 | rs731236   | 12 | 47846052 | rs1544410  | 0.562537 | -        |
| 12                                                 | 47845054 | rs7975232  | 12 | 47846052 | rs1544410  | 0.402096 | 0.792282 |
| 12                                                 | 57764205 | rs4646536  | 12 | 57768115 | rs3782130  | 0.810826 | 0.924972 |
| 12                                                 | 57764205 | rs4646536  | 12 | 57768302 | rs10877012 | 0.673952 | 0.868872 |
| 12                                                 | 57764205 | rs4646536  | 12 | 57768956 | rs703842   | 0.754507 | 0.899834 |
| 12                                                 | 57768115 | rs3782130  | 12 | 57768302 | rs10877012 | 0.706778 | 0.874134 |
| 12                                                 | 57768115 | rs3782130  | 12 | 57768956 | rs703842   | 0.798471 | 0.908186 |
| 12                                                 | 57768302 | rs10877012 | 12 | 57768956 | rs703842   | 0.64727  | 0.851107 |
| Chr: Chromosome; BP: Physical position (base-pair) |          |            |    |          |            |          |          |

Table S3. Minor allele frequencies of SNPs.

| Chr                                          | SNP        | Minor Allele | Major Allele | MAF    |
|----------------------------------------------|------------|--------------|--------------|--------|
| 4                                            | rs7041     | T            | G            | 0.4709 |
| 11                                           | rs10741657 | A            | G            | 0.3656 |
| 12                                           | rs731236   | C            | T            | 0.4041 |
| 12                                           | rs7975232  | C            | A            | 0.4817 |
| 12                                           | rs1544410  | A            | G            | 0.4396 |
| 12                                           | rs2228570  | T            | C            | 0.3586 |
| 12                                           | rs11568820 | A            | G            | 0.2679 |
| 12                                           | rs4646536  | G            | A            | 0.2577 |
| 12                                           | rs3782130  | C            | G            | 0.2546 |
| 12                                           | rs10877012 | T            | G            | 0.2534 |
| 12                                           | rs703842   | C            | T            | 0.2573 |
| 20                                           | rs4809957  | G            | A            | 0.2243 |
| 20                                           | rs6068816  | T            | C            | 0.1204 |
| Chr: Chromosome; MAF: Minor allele frequency |            |              |              |        |

Table S4. Haplotype frequencies estimation.

|    | rs1544410 | rs7975232 | rs731236 | rs4646536 | rs703842 | rs3782130 | rs10877012 | Total  | Case group | Control group | Cumulative frequency |
|----|-----------|-----------|----------|-----------|----------|-----------|------------|--------|------------|---------------|----------------------|
| 1  | G         | C         | T        | A         | T        | G         | G          | 0.3338 | 0.3606     | 0.3197        | 0.3338               |
| 2  | A         | A         | C        | A         | T        | G         | G          | 0.2393 | 0.2535     | 0.2323        | 0.5731               |
| 3  | A         | A         | C        | G         | C        | C         | T          | 0.1055 | 0.0997     | 0.1086        | 0.6786               |
| 4  | G         | C         | T        | G         | C        | C         | T          | 0.0636 | 0.0834     | 0.0534        | 0.7422               |
| 5  | G         | A         | T        | A         | T        | G         | G          | 0.0626 | 0.0508     | 0.0684        | 0.8049               |
| 6  | A         | C         | T        | A         | T        | G         | G          | 0.031  | 0.0123     | 0.0416        | 0.8359               |
| 7  | G         | A         | T        | G         | C        | C         | T          | 0.0254 | 0.0343     | 0.02          | 0.8613               |
| 8  | A         | A         | T        | A         | T        | G         | G          | 0.0138 | 0.0095     | 0.016         | 0.8751               |
| 9  | G         | A         | C        | A         | T        | G         | G          | 0.013  | 0.0061     | 0.0164        | 0.888                |
| 10 | G         | A         | C        | G         | C        | C         | T          | 0.0076 | 0.0125     | 0.0052        | 0.8956               |
| 11 | A         | C         | T        | G         | C        | C         | T          | 0.0072 | 0.0036     | 0.0086        | 0.9028               |
| 12 | A         | A         | C        | G         | C        | C         | G          | 0.007  | 0.0022     | 0.0093        | 0.9098               |
| 13 | G         | C         | T        | A         | T        | G         | T          | 0.0062 | 0.0029     | 0.0086        | 0.9161               |
| 14 | G         | C         | T        | G         | C        | C         | G          | 0.0061 | NA         | 0.0098        | 0.9222               |
| 15 | G         | C         | T        | A         | C        | G         | G          | 0.0057 | 0.0069     | 0.0033        | 0.9279               |
| 16 | G         | A         | T        | A         | T        | G         | T          | 0.0057 | NA         | 0.01          | 0.9336               |
| 17 | G         | C         | T        | A         | C        | C         | T          | 0.0054 | 0.0114     | 0.0023        | 0.939                |
| 18 | G         | C         | T        | G         | T        | G         | G          | 0.0052 | 0.0046     | 0.0056        | 0.9442               |
| 19 | A         | A         | C        | G         | T        | C         | T          | 0.0049 | 0.0092     | 0.0033        | 0.949                |
| 20 | A         | A         | C        | A         | C        | G         | G          | 0.0048 | 0.0033     | 0.0064        | 0.9538               |
| 21 | A         | A         | T        | G         | C        | C         | T          | 0.0047 | NA         | 0.0076        | 0.9586               |
| 22 | G         | C         | T        | A         | T        | C         | G          | 0.0044 | 0          | 0.0058        | 0.9629               |
| 23 | A         | A         | C        | A         | T        | G         | T          | 0.004  | 0.0054     | 0.0019        | 0.9669               |
| 24 | A         | A         | C        | G         | C        | G         | G          | 0.0029 | 0.0046     | 0.0017        | 0.9699               |
| 25 | G         | C         | T        | G         | T        | C         | T          | 0.0025 | NA         | 0.003         | 0.9724               |
| 26 | A         | C         | C        | A         | T        | G         | G          | 0.0025 | 0.0035     | 0.001         | 0.9749               |
| 27 | G         | C         | T        | G         | C        | G         | T          | 0.002  | NA         | 0.0036        | 0.9769               |
| 28 | A         | A         | C        | G         | T        | C         | G          | 0.0019 | 0.0023     | 0.0023        | 0.9788               |
| 29 | G         | A         | T        | G         | T        | C         | T          | 0.0019 | NA         | 0.0031        | 0.9807               |
| 30 | A         | A         | C        | G         | T        | G         | G          | 0.0019 | NA         | 0.0023        | 0.9825               |
| 31 | G         | A         | T        | G         | C        | C         | G          | 0.0017 | NA         | 0.0024        | 0.9842               |
| 32 | G         | C         | C        | A         | T        | G         | G          | 0.0017 | NA         | 0.0029        | 0.9859               |
| 33 | A         | A         | T        | A         | T        | G         | T          | 0.0014 | 0.0023     | NA            | 0.9873               |
| 34 | A         | A         | C        | A         | T        | C         | G          | 0.0012 | 0.0023     | 0.0015        | 0.9885               |
| 35 | G         | C         | T        | G         | C        | G         | G          | 0.001  | NA         | 0.0027        | 0.9895               |
| 36 | A         | C         | C        | G         | C        | C         | T          | 0.001  | 0.004      | NA            | 0.9904               |
| 37 | A         | A         | C        | A         | C        | G         | T          | 9e-04  | 0.003      | NA            | 0.9913               |
| 38 | A         | A         | C        | A         | C        | C         | G          | 8e-04  | 0.0023     | NA            | 0.9921               |
| 39 | A         | C         | C        | A         | T        | C         | G          | 8e-04  | NA         | 0.0012        | 0.9929               |
| 40 | G         | C         | C        | G         | T        | G         | G          | 8e-04  | NA         | 0.0012        | 0.9937               |
| 41 | G         | A         | T        | G         | T        | G         | T          | 8e-04  | NA         | 0.0012        | 0.9945               |
| 42 | A         | A         | T        | A         | T        | C         | G          | 8e-04  | NA         | 0.0012        | 0.9952               |
| 43 | G         | C         | C        | G         | T        | G         | T          | 8e-04  | NA         | 0.0012        | 0.996                |
| 44 | G         | A         | T        | A         | C        | G         | T          | 7e-04  | NA         | 0.0011        | 0.9967               |
| 45 | G         | A         | T        | G         | C        | G         | T          | 6e-04  | 0.0023     | NA            | 0.9973               |
| 46 | G         | A         | C        | A         | T        | C         | G          | 6e-04  | NA         | 9e-04         | 0.9979               |
| 47 | G         | A         | T        | G         | C        | G         | G          | 6e-04  | NA         | NA            | 0.9985               |
| 48 | A         | A         | T        | A         | C        | G         | G          | 5e-04  | NA         | 0.001         | 0.9991               |
| 49 | A         | A         | C        | G         | C        | G         | T          | 5e-04  | NA         | 0             | 0.9996               |
| 50 | A         | A         | T        | G         | T        | G         | G          | 4e-04  | NA         | 4e-04         | 1                    |
| 51 | G         | A         | T        | A         | T        | C         | G          | 0      | NA         | NA            | 1                    |
| 52 | G         | A         | T        | A         | C        | G         | G          | 0      | 0.0013     | NA            | 1                    |

\* Rare haplotypes; NA: not available

Table S5. Polymorphisms and association with risk of asthma.

| SNP        | Minor Allele | Mayor Allele | Model     | Cases     | Controls   | $\chi^2$ | p-value $\chi^2$ | p-value Fisher | Adjusted p-value* |
|------------|--------------|--------------|-----------|-----------|------------|----------|------------------|----------------|-------------------|
| rs7041     | T            | G            | Genotypic | 43/109/67 | 97/226/111 | 1.995    | 0.3687           | 0.3793         | 1                 |
|            |              |              | Additive  | 195/243   | 420/448    | 1.8      | 0.1797           | 0.1797         | 1                 |
|            |              |              | Allelic   | 195/243   | 420/448    | 1.747    | 0.1863           | 0.1967         | 1                 |
|            |              |              | Dominant  | 152/67    | 323/111    | 1.848    | 0.174            | 0.1926         | 1                 |
|            |              |              | Recessive | 43/176    | 97/337     | 0.6373   | 0.4247           | 0.4798         | 1                 |
| rs10741657 | A            | G            | Genotypic | 36/91/93  | 60/193/178 | 1.012    | 0.6029           | 0.6032         | 1                 |
|            |              |              | Additive  | 163/277   | 313/549    | 0.06396  | 0.8003           | 0.8003         | 1                 |
|            |              |              | Allelic   | 163/277   | 313/549    | 0.06777  | 0.7946           | 0.8079         | 1                 |
|            |              |              | Dominant  | 127/93    | 253/178    | 0.0568   | 0.8116           | 0.8665         | 1                 |
|            |              |              | Recessive | 36/184    | 60/371     | 0.6912   | 0.4058           | 0.415          | 1                 |
| rs731236   | C            | T            | Genotypic | 41/100/79 | 67/211/154 | 1.214    | 0.545            | 0.5368         | 1                 |
|            |              |              | Additive  | 182/258   | 345/519    | 0.2463   | 0.6197           | 0.6197         | 1                 |
|            |              |              | Allelic   | 182/258   | 345/519    | 0.2486   | 0.618            | 0.6333         | 1                 |
|            |              |              | Dominant  | 141/79    | 278/154    | 0.004322 | 0.9476           | 1              | 1                 |
|            |              |              | Recessive | 41/179    | 67/365     | 1.031    | 0.3098           | 0.3176         | 1                 |
| rs7975232  | C            | A            | Genotypic | 55/108/58 | 90/233/111 | 1.817    | 0.4031           | 0.3971         | 1                 |
|            |              |              | Additive  | 218/224   | 413/455    | 0.3712   | 0.5423           | 0.5423         | 1                 |
|            |              |              | Allelic   | 218/224   | 413/455    | 0.3554   | 0.5511           | 0.5592         | 1                 |
|            |              |              | Dominant  | 163/58    | 323/111    | 0.03416  | 0.8534           | 0.8508         | 1                 |
|            |              |              | Recessive | 55/166    | 90/344     | 1.463    | 0.2265           | 0.2335         | 1                 |
| rs1544410  | A            | G            | Genotypic | 43/101/77 | 89/210/134 | 1.016    | 0.6017           | 0.6072         | 1                 |
|            |              |              | Additive  | 187/255   | 388/478    | 0.7151   | 0.3977           | 0.3977         | 1                 |
|            |              |              | Allelic   | 187/255   | 388/478    | 0.7401   | 0.3896           | 0.4099         | 1                 |
|            |              |              | Dominant  | 144/77    | 299/134    | 1.016    | 0.3136           | 0.3312         | 1                 |
|            |              |              | Recessive | 43/178    | 89/344     | 0.1094   | 0.7409           | 0.7586         | 1                 |
| rs2228570  |              | G            | Genotypic | 30/91/100 | 54/210/169 | 3.219    | 0.2              | 0.1987         | 1                 |
|            |              |              | Additive  | 151/291   | 318/548    | 0.8328   | 0.3615           | 0.3615         | 1                 |
|            |              |              | Allelic   | 151/291   | 318/548    | 0.8323   | 0.3616           | 0.3935         | 1                 |
|            |              |              | Dominant  | 121/100   | 264/169    | 2.337    | 0.1263           | 0.1313         | 1                 |
|            |              |              | Recessive | 30/191    | 54/379     | 0.1592   | 0.6899           | 0.7116         | 1                 |
| rs11568820 | A            | G            | Genotypic | 26/81/113 | 20/172/232 | 11.05    | 0.003991         | 0.00527        | 0.039             |
|            |              |              | Additive  | 133/307   | 212/636    | 4.043    | 0.04436          | 0.04436        | 0.5767            |
|            |              |              | Allelic   | 133/307   | 212/636    | 4.036    | 0.04453          | 0.04674        | 0.5789            |
|            |              |              | Dominant  | 107/113   | 192/232    | 0.6548   | 0.4184           | 0.4536         | 1                 |
|            |              |              | Recessive | 26/194    | 20/404     | 11.01    | 0.0009051        | 0.00183        | 0.01086           |
| rs4646536  | G            | A            | Genotypic | 12/92/117 | 24/172/235 | 0.1799   | 0.914            | 0.9156         | 1                 |
|            |              |              | Additive  | 116/326   | 220/642    | 0.08464  | 0.7711           | 0.7711         | 1                 |
|            |              |              | Allelic   | 116/326   | 220/642    | 0.07969  | 0.7777           | 0.7893         | 1                 |
|            |              |              | Dominant  | 104/117   | 196/235    | 0.1474   | 0.701            | 0.74           | 1                 |
|            |              |              | Recessive | 12/209    | 24/407     | 0.005378 | 0.9415           | 1              | 1                 |
| rs3782130  | C            | G            | Genotypic | 12/92/115 | 22/172/239 | 0.4252   | 0.8085           | 0.784          | 1                 |
|            |              |              | Additive  | 116/322   | 216/650    | 0.3904   | 0.5321           | 0.5321         | 1                 |
|            |              |              | Allelic   | 116/322   | 216/650    | 0.3643   | 0.5461           | 0.5455         | 1                 |
|            |              |              | Dominant  | 104/115   | 194/239    | 0.4225   | 0.5157           | 0.5603         | 1                 |
|            |              |              | Recessive | 12/207    | 22/411     | 0.04676  | 0.8288           | 0.853          | 1                 |
| rs10877012 | T            | G            | Genotypic | 14/93/114 | 22/166/244 | 1.542    | 0.4627           | 0.4439         | 1                 |
|            |              |              | Additive  | 121/321   | 210/654    | 1.53     | 0.2161           | 0.2161         | 1                 |
|            |              |              | Allelic   | 121/321   | 210/654    | 1.457    | 0.2275           | 0.2272         | 1                 |
|            |              |              | Dominant  | 107/114   | 188/244    | 1.416    | 0.2341           | 0.2454         | 1                 |
|            |              |              | Recessive | 14/207    | 22/410     | 0.4331   | 0.5105           | 0.5871         | 1                 |
| rs703842   | C            | T            | Genotypic | 13/95/112 | 22/169/238 | 1.24     | 0.5379           | 0.5223         | 1                 |
|            |              |              | Additive  | 121/319   | 213/645    | 1.164    | 0.2807           | 0.2807         | 1                 |
|            |              |              | Allelic   | 121/319   | 213/645    | 1.089    | 0.2967           | 0.3145         | 1                 |
|            |              |              | Dominant  | 108/112   | 191/238    | 1.222    | 0.269            | 0.2803         | 1                 |
|            |              |              | Recessive | 13/207    | 22/407     | 0.1738   | 0.6768           | 0.7147         | 1                 |
| rs4809957  | G            | A            | Genotypic | 8/84/127  | 13/162/248 | 0.1584   | 0.9238           | 0.9382         | 1                 |

|                                                                                                                                   |   |   |           |          |          |         |        |        |        |
|-----------------------------------------------------------------------------------------------------------------------------------|---|---|-----------|----------|----------|---------|--------|--------|--------|
|                                                                                                                                   |   |   | Additive  | 100/338  | 188/658  | 0.0684  | 0.7937 | 0.7937 | 1      |
|                                                                                                                                   |   |   | Allelic   | 100/338  | 188/658  | 0.06148 | 0.8042 | 0.8324 | 1      |
|                                                                                                                                   |   |   | Dominant  | 92/127   | 175/248  | 0.02418 | 0.8764 | 0.9327 | 1      |
|                                                                                                                                   |   |   | Recessive | 8/211    | 13/410   | 0.1532  | 0.6955 | 0.8154 | 1      |
| rs6068816                                                                                                                         | T | C | Genotypic | 4/43/174 | 7/92/332 | NA      | NA     | 0.8135 | NA     |
|                                                                                                                                   |   |   | Additive  | 51/391   | 106/756  | 0.1553  | 0.6936 | 0.6936 | 0.4109 |
|                                                                                                                                   |   |   | Allelic   | 51/391   | 106/756  | 0.1587  | 0.6903 | 0.7199 | 0.3761 |
|                                                                                                                                   |   |   | Dominant  | 47/174   | 99/332   | NA      | NA     | 0.6915 | NA     |
|                                                                                                                                   |   |   | Recessive | 4/217    | 7/424    | NA      | NA     | 1      | NA     |
| Chr: chromosome; NA: not applicable; * p-value for Bonferroni correction<br>Shade means the value significant for t test (p<0.05) |   |   |           |          |          |         |        |        |        |
